# Supplementary material
Source: Royal Society of Chemistry journal article supplement (doi:10.1039/d6ta02064j)
Supplement: d6ta02064j1.pdf [file d6ta02064j1.pdf]

## Supplementary Information for

### **High-entropy engineering for achieving linear-like behavior and superior energy storage in $\text{Bi}_{0.5}\text{Na}_{0.5}\text{TiO}_3$ -based lead-free relaxor ferroelectrics**

Jiangping Huang, Yu Zhang, Yue Pan, Xiuli Chen \*, Xu Li \*, Huanfu Zhou

Key Laboratory of New Processing Technology for Nonferrous Metal and Materials, Ministry of Education, Guangxi Key Laboratory of Optical and Electronic Materials and Devices, College of Materials Science and Engineering, Guilin University of Technology, Guilin, 541004, China

\* Corresponding author, Email: cxlnwpu@163.com; lx100527@163.com

## 1. Structure characterizations

The phase structure and local structure evolution of all samples were characterized by X-ray powder diffraction (XRD, model X'Pert PRO; PANalytical, Almelo, The Netherlands) using Cu K $\alpha$  radiation ( $\lambda = 0.15406$  nm) and Raman(XDR) (XDR, Thermo Fisher Scientific, USA) tests, respectively. A scanning electron microscope (model GeminiSEM 300, OXIG, Oxfordshire, UK) was used to observe the microstructure of the specimens. The dielectric-temperature spectrum of the ceramics was measured using a precision impedance analyzer (Model 4294A, Hewlett-Packard Co, Palo Alto, CA) in the temperature range of 30 to 400°C with the heating rate of 2 °C min<sup>-1</sup>. A simple parallel plate capacitor was fabricated for  $P$ - $E$  loop testing (Ferroelectric Material Parameter Tester (RT66, Radiant Technologies, NM, USA)). Dielectric Charge Test System (model PK-DIS10012, PolyK Technologies, USA) was used to measure the charging/discharging properties, and a 10 k $\Omega$  overload resistance was used. To study the evolution of domain structures, Piezoresponse Force Microscope (PFM, MFP-3D, UK) is applied by Pt/Ir-coated conductive tips (Nanosensors, Neuchatel, Switzerland) with an AC tip voltage of 3 V in out-of-plane mode.

## 2 Phase-field simulations method for breakdown behavior of ceramics

Building on the phase-field breakdown model proposed by Hong et al. <sup>1</sup>, here a scalar field  $s(\mathbf{x}, t)$  is introduced to characterize the breakdown state of the 0.92BNBT-0.06NMS and 0.84BNBT-0.16NMS ceramics. In this model, the  $s$  ranges from 1 to 0, representing the intact state and the complete breakdown state, respectively. Herein,  $\epsilon_r$  is a continuous function of the field variable  $s$  and can be expressed as <sup>2,3</sup>:

$$\epsilon(s) = \frac{\epsilon_{intact}}{f(s) + \delta}, \quad (1)$$

where  $f(s) = 4s^3 - 3s^4$ ,  $\delta$  is a very small value. To quantitatively describe the dielectric breakdown

behavior, the  $\varepsilon_r(0)$  of the matrix phase is set to 10/1 (the ratio of the grain to the grain boundary). For the ferroelectric polycrystalline ceramics in this study, the grain regions are considered to have pronounced ferroelectric properties. The corresponding  $\varepsilon_r$  is electric field dependent following Johnson's approximation <sup>4</sup>. For the grain boundary regions, the  $\varepsilon_r$  is approximately independent of the electric field. Therefore, the relationship between the dielectric constant of ceramic and the electric field can be expressed by the following formula :

$$\varepsilon_r(E) = \begin{cases} \varepsilon_g(0) / (1 + kE^2)^{2/3}, & \text{the grain regions} \\ \varepsilon_{gb}(E), & \text{the grain boundary regions} \end{cases}, \quad (2)$$

where the parameter  $k$  is a material constant that is related to the Johnson's parameter  $\beta$  by  $k = 3[\beta(\varepsilon_0\varepsilon_g(0))^3]$ . The  $\varepsilon_g(0)$ , and  $\varepsilon_{gb}(0)$  are the  $\varepsilon_r$  of grain and grain boundary regions at zero electric field, respectively. The theoretical model in this work is built by the dimensionless governing equation as follows <sup>5</sup>:

$$\begin{cases} \overline{\nabla}[\varepsilon_g(s)(1 + k\overline{\nabla}\overline{\phi} \cdot \overline{\phi})^{-\frac{1}{3}\overline{\nabla}\overline{\phi}}] = 0 \\ \frac{\partial s}{\partial t} = -\frac{3\varepsilon'_g(s)}{4k}((1 + k\overline{\nabla}\overline{\phi} \cdot \overline{\nabla}\overline{\phi})^{\frac{2}{3}} - 1) + f'(s) + \frac{1}{2}\overline{\nabla}^2 s \end{cases}, \text{ the grain regions}, \quad (3)$$

$$\begin{cases} \overline{\nabla} \cdot [\varepsilon_{gb}(s)\overline{\nabla}\overline{\phi}] = 0 \\ \frac{\partial s}{\partial t} = -\frac{\varepsilon'_{gb}(s)}{2}\overline{\nabla}\overline{\phi} \cdot \overline{\nabla}\overline{\phi} + f'(s) + \frac{1}{2}\overline{\nabla}^2 s \end{cases}, \text{ the grain boundary regions}, \quad (4)$$

where the electric field vector  $\mathbf{E}$  is related to the field of electric potential  $\phi(\mathbf{x}, t)$  ( $\mathbf{E} = -\nabla\phi$ ).

Due to computational limitations, simulation is carried out in two-dimensional (2D) domains. The electric field concentrator is introduced to control the overall random defects. Eqs. (3) and (4) are applied to the solution of dimensionless unknown fields  $\phi(\mathbf{x}, t)$  and  $s(\mathbf{x}, t)$ .

### 3. Supplementary Figures

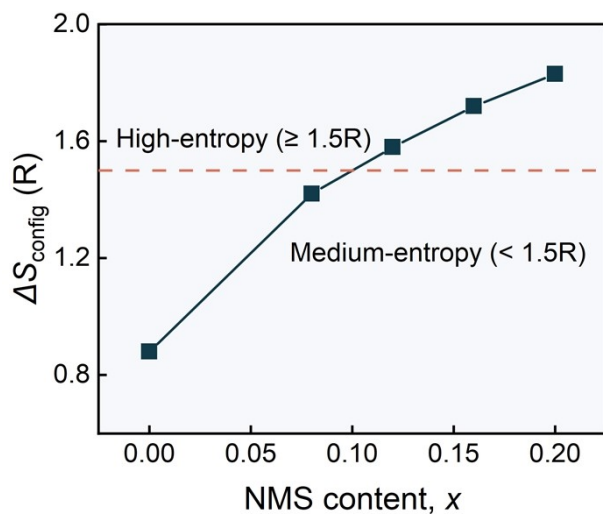

**Figure S1** The configuration entropy ( $\Delta S_{\text{config}}$ ) for the  $(1-x)\text{BNBT}-x\text{NMS}$  ceramics.

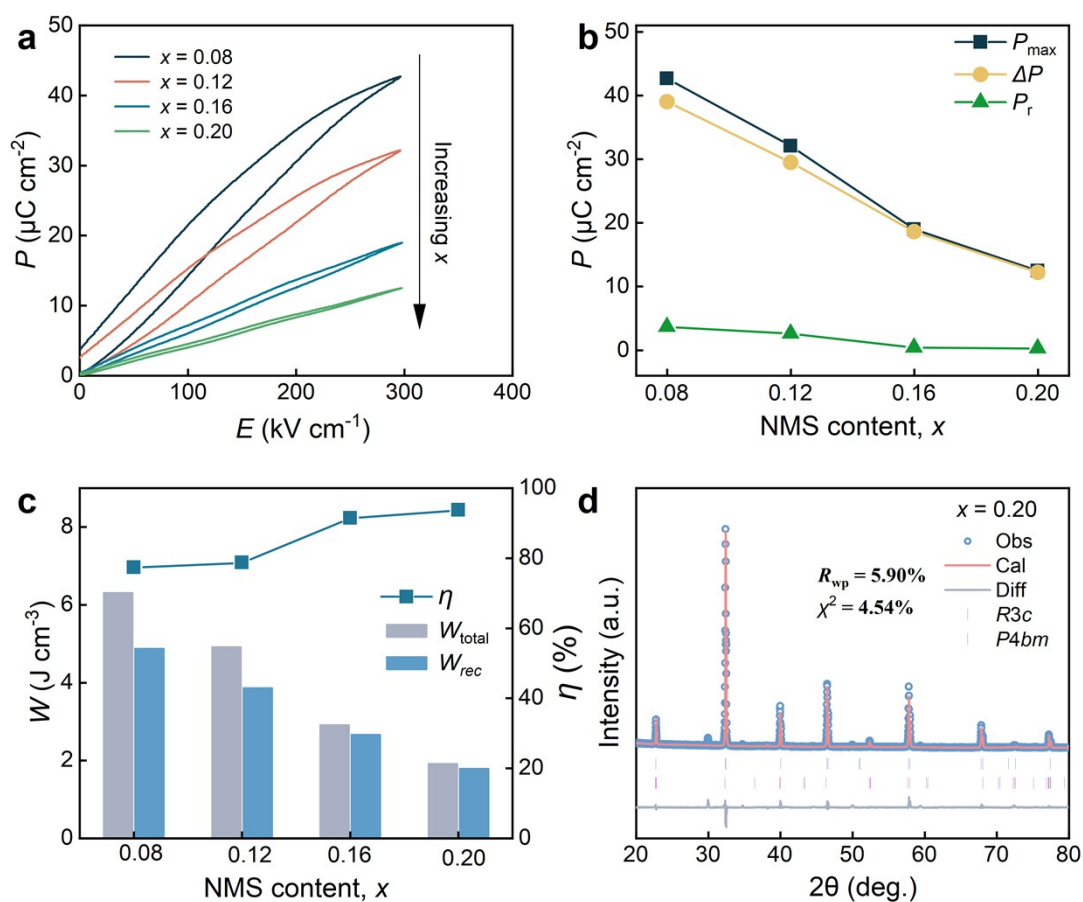

**Figure S2** (a) Unipolar P-E hysteresis loop of  $(1-x)\text{BNBT}-x\text{NMS}$  ceramics under  $300 \text{ kV cm}^{-1}$  and (b-c) the corresponding changes in polarization and energy storage parameters. (d) Rietveld refinements for  $x = 0.20$ .

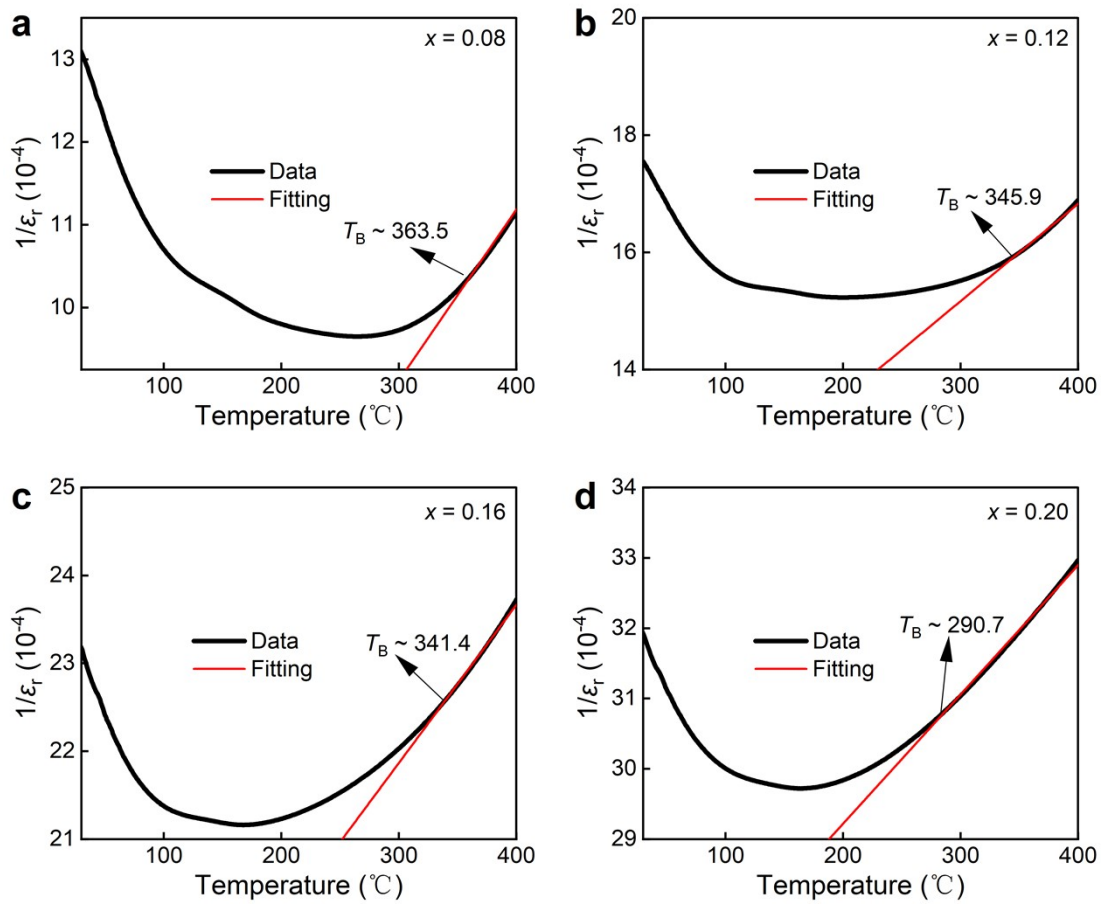

**Figure S3 (a-d)** Temperature dependence reciprocal of  $\epsilon_r$  for  $(1-x)\text{BNBT}-x\text{NMS}$  ceramics at 10 kHz.

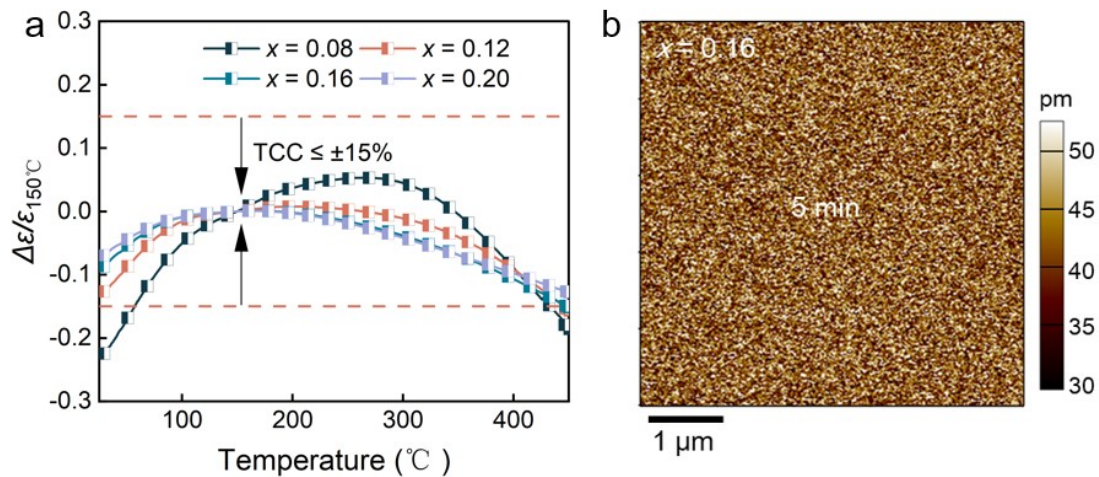

**Figure S4 (a)** Thermal stability for  $(1-x)\text{BNBT}-x\text{NMS}$  ceramics at 10 kHz. **(b)** PFM amplitude after relaxation of 5 min for 0.84BNBT-0.16NMS ceramic.

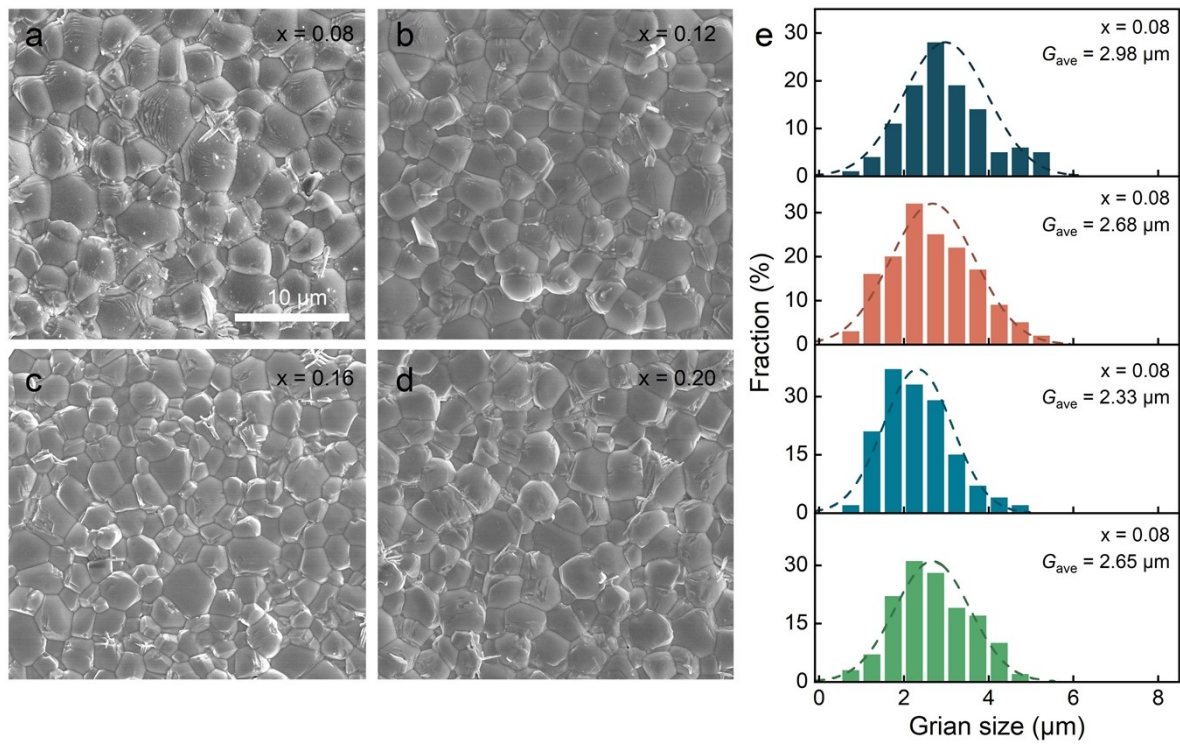

**Figure S5 (a-d)** SEM images of (1-x)BNBT-xNMS ceramics and (e) the corresponding grain size distribution chart.

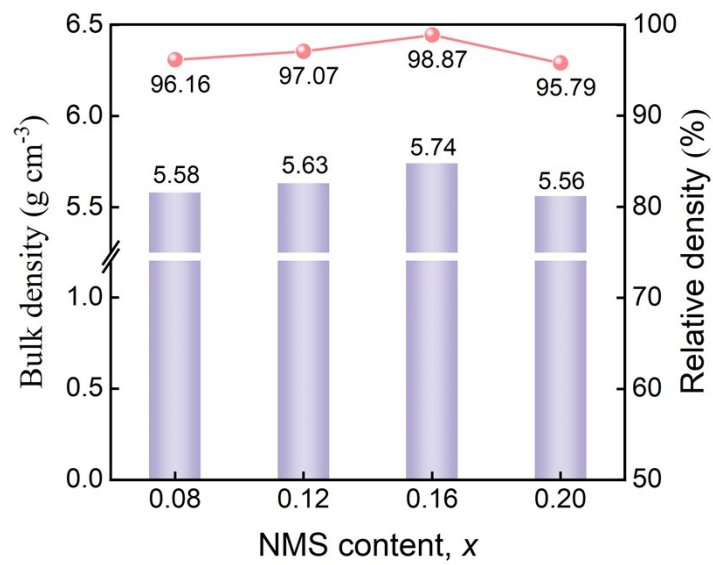

**Figure S6** Bulk density and relative density for all ceramics.

Table S1 Refined structural parameters of (1-x)BNBT-xNMS ceramics.

| Component | Space group          | Lattice parameters                                                             | $V$ (Å <sup>3</sup> ) |
|-----------|----------------------|--------------------------------------------------------------------------------|-----------------------|
| 0.08      | <i>R3c</i> (59.14%)  | $a = b = 5.52397, c = 13.56581, \alpha = \beta = 90^\circ, \gamma = 120^\circ$ | 358.493               |
|           | <i>P4bm</i> (40.86%) | $a = b = 5.51595, c = 3.90227, \alpha = \beta = \gamma = 90^\circ$             | 118.730               |
| 0.12      | <i>R3c</i> (43.52%)  | $a = b = 5.52803, c = 13.54702, \alpha = \beta = 90^\circ, \gamma = 120^\circ$ | 358.522               |
|           | <i>P4bm</i> (56.48%) | $a = b = 5.51561, c = 3.90261, \alpha = \beta = \gamma = 90^\circ$             | 118.725               |
| 0.16      | <i>R3c</i> (20.27%)  | $a = b = 5.51783, c = 13.54925, \alpha = \beta = 90^\circ, \gamma = 120^\circ$ | 357.259               |
|           | <i>P4bm</i> (79.73%) | $a = b = 5.51597, c = 3.90233, \alpha = \beta = \gamma = 90^\circ$             | 118.732               |
| 0.20      | <i>R3c</i> (12.63%)  | $a = b = 5.51706, c = 13.52013, \alpha = \beta = 90^\circ, \gamma = 120^\circ$ | 356.432               |
|           | <i>P4bm</i> (87.37%) | $a = b = 5.51993, c = 3.91477, \alpha = \beta = \gamma = 90^\circ$             | 118.991               |

Table S2 V-F fitting parameters for (1-x)BNBT-xNMS ceramics.

| Component  | $f_0$ (Hz)           | $T_f$ (K) | $E_a$ (eV) |
|------------|----------------------|-----------|------------|
| $x = 0.08$ | $8.0 \times 10^{10}$ | 360.6     | 0.0311     |
| $x = 0.12$ | $5.0 \times 10^{11}$ | 327.2     | 0.0844     |
| $x = 0.16$ | $6.0 \times 10^{11}$ | 280.2     | 0.1293     |
| $x = 0.20$ | $1.0 \times 10^{12}$ | 240.7     | 0.1750     |

Table S3 The parameters used in the finite element simulations for breakdown behavior.

| Parameters            | Value                                     | Definition                                                                         |
|-----------------------|-------------------------------------------|------------------------------------------------------------------------------------|
| $\beta$               | $1 \times 10^{10} \text{ Vm}^5\text{C}^-$ | LGD parameter                                                                      |
| $\Gamma_g$            | $3.6 \times 10^{-8} \text{ J m}^{-1}$     | Constant coefficient related to the breakdown energy of the grain regions          |
| $\Gamma_{gb}$         | $3.6 \times 10^{-9} \text{ J m}^{-1}$     | Constant coefficient related to the breakdown energy of the grain boundary regions |
| $\varepsilon_g(0)$    | 796.74                                    | The $\varepsilon_r$ of the grain regions in 0.92BNBT-0.08NMS                       |
| $\varepsilon_{gb}(0)$ | 79.674                                    | The $\varepsilon_r$ of the grain boundary regions in 0.92BNBT-                     |
| $\varepsilon_g(0)$    | 455.58                                    | The $\varepsilon_r$ of the grain regions in 0.84BNBT-0.16NMS                       |
| $\varepsilon_{gb}(0)$ | 45.558                                    | The $\varepsilon_r$ of the grain boundary regions in 0.84BNBT-                     |
| $\varepsilon_0$       | $8.854 \times 10^{-12}$                   | Permittivity of space                                                              |
| $\delta$              | $10^{-4}$                                 | A small positive constant meant to numerical stability                             |

## References

1. Chaitanya Pitike, K.; Hong, W., Phase-field model for dielectric breakdown in solids. *J. Appl. Phys.* **2014**, *115* (4), 044101.
2. Cai, Z.; Wang, X.; Luo, B.; Hong, W.; Wu, L.; Li, L., Dielectric response and breakdown behavior of polymer-ceramic nanocomposites: The effect of nanoparticle distribution. *Compos. Sci. Technol.* **2017**, *145*, 105-113.
3. Zhao, P.; Cai, Z.; Chen, L.; Wu, L.; Huan, Y.; Guo, L.; Li, L.; Wang, H.; Wang, X., Ultra-high energy storage performance in lead-free multilayer ceramic capacitors via a multiscale optimization strategy. *Energy Environ. Sci.* **2020**, *13* (12), 4882-4890.
4. Johnson, K. M., Variation of dielectric constant with voltage in ferroelectrics and its application to parametric devices. *J. Appl. Phys.* **1962**, *33* (9), 2826-2831.
5. Khondabi, M.; Ahmadvand, H.; Javanbakht, M., Revisiting the Dielectric Breakdown in a Polycrystalline Ferroelectric: A Phase-Field Simulation Study. *Advanced Theory and Simulations* **2022**, *6* (1), 2200314.
